# Supplementary material
Source: PubMed Central journal article supplement (PMC4291207)
Supplement: Supp_Fig3.pdf [file Supp_Fig3.pdf]

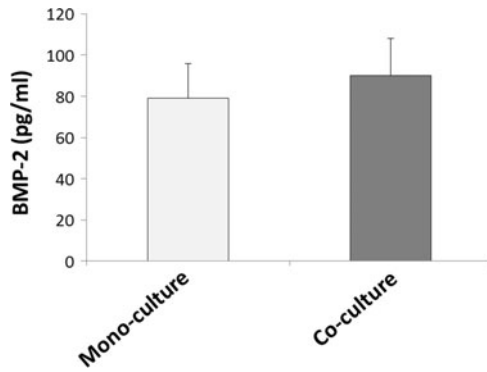

**SUPPLEMENTARY FIG. S3.** The concentration of BMP-2 in the culture media of mono-cultured and co-cultured 10T-GFP cells. Enzyme-linked immunosorbant assay (ELISA) analysis of the amounts of BMP-2 released into the growth medium by 10T-GFP cells that were mono-cultured or co-cultured with MLO-A5 cells for 3 days. Data for BMP-4 are not shown, because their levels were below the level of detection of the ELISA kit in both types of medium. Data are represented as the mean  $\pm$  SD of  $n=3$  replicates.
