# Supplementary material
Source: PubMed Central journal article supplement (PMC4291207)
Supplement: Supp_Table1.pdf [file Supp_Table1.pdf]

## Supplementary Data

SUPPLEMENTARY TABLE S1. PRIMERS USED FOR REAL-TIME RT-PCR

| Gene                            | Primer                                                                  |
|---------------------------------|-------------------------------------------------------------------------|
| <i>Runx2</i>                    | 5'-ACAA CCA CAG AAC CAC AAG-3' and 5'-TCT CGG TGG CTG GTA GTG A-3'      |
| <i>osterix</i>                  | 5'-GGA GGT TTC ACT CCA TTC CA-3' and 5'-TAG AAG GAG CAG GGG ACA GA-3'   |
| <i>Dlx5</i>                     | 5'-ATGACAGGAGTGTGGTGGACAG-3' and 5'-ATAAGAAGCAGAGGTAGG-3'               |
| <i>Msx2</i>                     | 5'-CAA GCC CTT CGA GAC CGC C-3' and 5'-CAG GTA CTG TTT CTG GCG G-3'     |
| <i>ALP</i>                      | 5'-GAC AAG AAG CCC TTC ACA GC-3' and 5'-CTG GGC CTG GTA GTT GTT GT-3'   |
| <i>BSP</i>                      | 5'-TGG TCT TCA TTC CCC TCA GA-3' and 5'-TGA AAC GGT TTC CAG TCC AG-3'   |
| <i>OCN</i>                      | 5'-GAC AAG TCC CAC ACA GCA GCT-3' and 5'-GGA CAT GAA GGC TTT GTC AGA-3' |
| <i>OPN</i>                      | 5'-TGC ACC CAG ATC CTA TAG CC-3' and 5'-CTC CAT CGT CAT CAT CAT CG-3'   |
| <i>ADD-1</i>                    | 5'-GAT CAA AGA GGA GCC AGT GC-3' and 5'-TAG ATG GTG GCT GCT GAG TG-3'   |
| <i>PPAR<math>\gamma</math>2</i> | 5'-TAT GGG YGA AAC TAT GGG A-3' and 5'-TGG CAT CTC TGT GTC ACC AT-3'    |
| <i>Ap2</i>                      | 5'-ATG GGA TGG AAA ATC AAC CA-3' and 5'-GTG GAA GTG ACG CCT TTC AT-3'   |
| <i>Adiponectin</i>              | 5'-GCA GAG ATG GCA CTC CTG-3' and 5'-CCC TTC AGC TCC TGT CAT TCC-3'     |
| <i>ID-1</i>                     | 5'-CTG AAC GGC GAG ATC AG-3' and 5'-CCA TCT GGT TCC TCA GTG C-3'        |
| <i>Smad6</i>                    | 5'-TACCACTTCAGCCGGCTCTG-3' and 5'-AGTACGCCACGCTGCACCAG-3'               |
| <i><math>\beta</math>-actin</i> | 5'-CTT TCT ACA ATG AGC TGC GTG-3' and 5'-ATG GCT GGG GTG TTG AAG G-3'   |

Sequences of the forward and reverse primers used for real-time RT-PCR amplifications of osteogenic transcription factors (*Runx2*, *Osterix*, *Dlx5*, and *Msx2*), osteoblast markers (*ALP*, *BSP*, *OCN*, and *OPN*), adipocyte markers (*ADD-1*, *PPAR $\gamma$ 2*, *aP2*, and *adiponectin*), *ID-1*, *Smad6*, and  $\beta$ -actin.

*ADD-1*, adipocyte differentiation and determination factor 1; *aP2*, adipocyte protein 2; *ID-1*, inhibitor of DNA binding protein 1; *PPAR $\gamma$ 2*, peroxisome proliferator-activated receptor  $\gamma$ 2; RT-PCR, reverse transcription PCR.
